# Supplementary material
Source: PubMed Central journal article supplement (PMC3623241)
Supplement: AEM.03279-12_zam999104223so1.pdf [file AEM.03279-12_zam999104223so1.pdf]

| Species/Taxon          | Strain   | mRNA     | mRNA accession     | gDNA     | gDNA accession |
|------------------------|----------|----------|--------------------|----------|----------------|
| <i>A. affine</i>       | CCMP112  | 139-1031 | JX995111           | 661-1031 | JX995112       |
| <i>A. andersoni</i>    | CCMP2222 | -        |                    | 664-1062 | JX995113       |
| <i>A. catenella</i>    | CCMP1493 | 85-1047  | JX995114           | 208-1017 | JX995115       |
| <i>A. catenella</i>    | ACCC01   | -        |                    | 238-1031 | JX995116       |
| <i>A. fundyense</i>    | CCMP1719 | 1-1125   | JX995117           | 127-1019 | JX995118       |
| <i>A. insuetum</i>     | CCMP2082 | 139-1019 | JX995119           | 214-1019 | JX995120       |
| <i>A. minutum</i>      | CCMP113  | 1-1125   | JX995121           | 220-1019 | JX995122       |
| <i>A. minutum</i>      | CS320/01 | -        |                    | 241-1017 | JX995123       |
| <i>A. minutum</i>      | CS324/16 | -        |                    | 241-1020 | JX995124       |
| <i>A. tamarensis</i>   | CCMP1771 | 139-1020 | JX995125           | 138-1020 | JX995126       |
| <i>A. tamarensis</i>   | ATEB01   | -        |                    | 214-641  | JX995127       |
| <i>G. catenatum</i>    | CCMP1937 | 676-1050 | JX995128           | -        |                |
| # <i>A. catenella</i>  | ACCC07   | 1-723    | EX463008           |          |                |
| # <i>A. tamarensis</i> | CCMP1598 | 593-1125 | CK786100, CK782453 |          |                |
| # <i>A. tamarensis</i> | CCMP1598 | 508-1125 | JV310276           |          |                |
| # <i>A. tamarensis</i> | -        | 1-1113   | SRX111568          |          |                |

**Supplemental Table 1.** *SxtG* amplification table of dinoflagellate species/strains used in this study. The numbers shown represent the (partial) sequence length and where this correlates to the *sxtG* ORF (intron excluded): 5'-(0-1125 bp)-3'. Additionally accession numbers are provided. – Denotes, not tested. # Denotes sequence not amplified from this study.
